# Supplementary material for: Plant-Based Titanium Dioxide Nanoparticles Trigger Biochemical and Proteome Modifications in Triticum aestivum L. under Biotic Stress of Puccinia striiformis
Source: MDPI journal article supplement (doi:10.3390/molecules27134274), 2022-07-02
Supplement: s1 [file s1]

## Supplementary Materials

**Phyto-fabricated titanium dioxide nanoparticles mediated biochemical and proteome modifications in *Tritium aestivum* L. under the biotic stress of *Puccinia striiformis***

Seema Hassan Satti <sup>1</sup>, Naveed Iqbal Raja <sup>1</sup>, Muhammad Ikram <sup>1</sup>, Ahmad A. Omar <sup>2, 3\*</sup>, Zia-Ur-Rehman Mashwani <sup>1</sup>, Azza H. Mohamed <sup>3,4</sup>, Hesham Oraby <sup>5,6</sup>, Ajit Singh <sup>7</sup>

**Table S1.** Relative abundance and functional categorization of up-regulated proteins of wheat plants under *Puccinia striiformis* stress.

| No | Protein IDs | Species                        | Description                        | Normalized Average (TIL) mg.L <sup>-1</sup> | Normalized Average (TOL) mg.L <sup>-1</sup> | P Value | Functions                      |
|----|-------------|--------------------------------|------------------------------------|---------------------------------------------|---------------------------------------------|---------|--------------------------------|
| 1  | A0A1D6BFP3  | <i>Triticum aestivum</i>       | Bifunctional protein FOLD          | 249.395                                     | 237.872                                     | 0.04    | Amino acid biosynthesis        |
| 2  | M8CE78      | <i>Aegilops tauschii</i>       | Actin-1                            | 289.734                                     | 269.741                                     | 0.05    | ATP binding                    |
| 3  | M8D3R3      | <i>Aegilops tauschii</i>       | Histone H4                         | 123.803                                     | 77.536                                      | 0.03    | DNA binding                    |
| 4  | A0A1D6BMJ7  | <i>Triticum aestivum</i>       | Fructose-bisphosphate aldolase     | 159.659                                     | 136.067                                     | 0.01    | DNA binding                    |
| 5  | M8BLC1      | <i>Aegilops tauschii</i>       | Uncharacterized protein            | 197.264                                     | 155.131                                     | 0.01    | DNA binding                    |
| 6  | A0A2A4UD83  | <i>Moraxellaceae bacterium</i> | DNA polymerase III subunit epsilon | 257.880                                     | 202.672                                     | 0.02    | DNA replication                |
| 7  | A0A1D5SSB2  | <i>Triticum aestivum</i>       | Uncharacterized protein            | 270.461                                     | 267.300                                     | 0.04    | Enzymatic activity             |
| 8  | M8C9E4      | <i>Aegilops tauschii</i>       | Fructose-bisphosphate aldolase     | 373.147                                     | 319.749                                     | 0.03    | Glycolytic process             |
| 9  | A0A2G1ZD24  | <i>Shewanella sp</i>           | Fructose-1,6-bisphosphate aldolase | 288.645                                     | 257.614                                     | 0.04    | Glycolytic process             |
| 10 | D5WHJ9      | <i>Triticum aestivum</i>       | Diguanylate cyclase                | 321.892                                     | 300.673                                     | 0.02    | Integral component of membrane |
| 11 | A0A1D6RID2  | <i>Triticum aestivum</i>       | RING finger protein 175            | 458.473                                     | 455.782                                     | 0.02    | Metal-ion binding              |
| 12 | A0A341SDD9  | <i>Triticum aestivum</i>       | Uncharacterized protein            | 387.740                                     | 355.061                                     | 0.03    | Not assigned                   |
| 13 | A0A341R419  | <i>Triticum aestivum</i>       | Uncharacterized protein            | 351.307                                     | 317.292                                     | 0.01    | Not assigned                   |
| 14 | A0A341RJ55  | <i>Triticum aestivum</i>       | Uncharacterized protein            | 278.162                                     | 219.907                                     | 0.01    | Not assigned                   |
| 15 | A0A341WRC8  | <i>Triticum aestivum</i>       | Uncharacterized protein            | 378.039                                     | 321.184                                     | 0.03    | Not assigned                   |
| 16 | A0A1D6RID4  | <i>Triticum aestivum</i>       | Uncharacterized protein            | 461.276                                     | 412.560                                     | 0.02    | Not assigned                   |
| 17 | A0A1D6REJ3  | <i>Triticum aestivum</i>       | Uncharacterized protein            | 377.209                                     | 361.158                                     | 0.04    | Not assigned                   |
| 18 | W5GSM3      | <i>Triticum aestivum</i>       | Uncharacterized protein            | 256.464                                     | 219.671                                     | 0.01    | Not assigned                   |
| 19 | A0A341Y173  | <i>Triticum aestivum</i>       | Uncharacterized protein            | 347.789                                     | 318.837                                     | 0.04    | Not assigned                   |
| 20 | A0A1D5SAJ4  | <i>Triticum aestivum</i>       | Uncharacterized protein            | 389.262                                     | 313.004                                     | 0.02    | Not assigned                   |
| 21 | A0A341PU48  | <i>Triticum aestivum</i>       | Uncharacterized protein            | 275.783                                     | 216.473                                     | 0.01    | Not assigned                   |

|    |            |                             |                                                   |         |         |      |                 |
|----|------------|-----------------------------|---------------------------------------------------|---------|---------|------|-----------------|
| 22 | W5BGE9     | <i>Triticum aestivum</i>    | Uncharacterized protein                           | 219.529 | 184.389 | 0.01 | Not assigned    |
| 23 | A0A1D5TH95 | <i>Triticum aestivum</i>    | Uncharacterized protein                           | 167.568 | 156.711 | 0.02 | Not assigned    |
| 24 | A0A341W521 | <i>Triticum aestivum</i>    | Uncharacterized protein                           | 281.760 | 277.568 | 0.04 | Not assigned    |
| 25 | A0A341Q4P7 | <i>Triticum aestivum</i>    | Uncharacterized protein                           | 383.832 | 356.729 | 0.03 | Photosynthesis  |
| 26 | A0A220IKU8 | <i>Triticum turgidum</i>    | Cytochrome b6 (Fragment)                          | 251.725 | 247.884 | 0.03 | Photosynthesis  |
| 27 | S17P       | <i>Arabidopsis thaliana</i> | Sedoheptulose-1,7-bisphosphatase, chloroplastic   | 178.672 | 157.047 | 0.01 | Plant Defense   |
| 28 | S4SD74     | <i>Aegilops speltoides</i>  | Ribulose biphosphate carboxylase large chain      | 390.371 | 326.369 | 0.02 | Respiration     |
| 29 | R7W1Q1     | <i>Aegilops tauschii</i>    | Malate dehydrogenase                              | 327.668 | 277.462 | 0.04 | Respiration     |
| 30 | M8C9D5     | <i>Aegilops tauschii</i>    | Ribonuclease 1                                    | 384.504 | 372.970 | 0.03 | RNA binding     |
| 31 | A0A1D5WDE3 | <i>Triticum aestivum</i>    | Uncharacterized protein                           | 256.667 | 212.681 | 0.05 | Stress response |
| 32 | A0A1D5WDE2 | <i>Triticum aestivum</i>    | Uncharacterized protein                           | 299.370 | 277.162 | 0.04 | Stress response |
| 33 | A0A1B5GE54 | <i>Triticum aestivum</i>    | Caleosin                                          | 217.020 | 166.793 | 0.03 | Stress response |
| 34 | E7D433     | <i>Triticum aestivum</i>    | EF-hand calcium-binding protein                   | 288.952 | 266.192 | 0.02 | Stress response |
| 35 | M8A9K0     | <i>Triticum urartu</i>      | Uncharacterized protein                           | 357.684 | 331.588 | 0.04 | Stress response |
| 36 | G8IS39     | <i>Pinus yunnanensis</i>    | Photosystem II protein D1                         | 337.705 | 289.053 | 0.01 | Stress response |
| 37 | M7YPJ9     | <i>Triticum urartu</i>      | 14 kDa proline-rich protein DC2.15                | 464.582 | 455.179 | 0.01 | Stress response |
| 38 | H9NAV2     | <i>Triticum aestivum</i>    | Chloroplast Cu/Zn superoxide dismutase (Fragment) | 335.893 | 310.050 | 0.01 | Stress response |
| 39 | A0A1D6CM42 | <i>Triticum aestivum</i>    | Superoxide dismutase [Cu-Zn]                      | 147.451 | 137.672 | 0.01 | Stress response |
| 40 | M8BN49     | <i>Aegilops tauschii</i>    | 50S ribosomal protein L12-2, chloroplastic        | 480.787 | 417.495 | 0.02 | Translation     |
| 41 | A0A1D5WKK3 | <i>Triticum aestivum</i>    | Uncharacterized protein                           | 375.690 | 372.654 | 0.04 | Transport       |
| 42 | 1D5WKK4    | <i>Triticum aestivum</i>    | Uncharacterized protein                           | 256.538 | 227.629 | 0.03 | Transport       |

**Table S2.** Relative abundance and functional categorization of down-regulated proteins in wheat plants under *Puccinia striiformis* stress.

| No. | Protein IDs | Species                        | Description                                              | Normalized Average (TIL)<br>mg.L <sup>-1</sup> | Normalized Average (T0L)<br>mg.L <sup>-1</sup> | P-Value | Functions                       |
|-----|-------------|--------------------------------|----------------------------------------------------------|------------------------------------------------|------------------------------------------------|---------|---------------------------------|
| 1   | A0A1D5U3N1  | <i>Triticum aestivum</i>       | Uncharacterized protein                                  | 276.183                                        | 286.739                                        | 0.01    | Arginine and proline metabolism |
| 2   | A0A218M001  | <i>Triticum turgidum</i>       | ATP synthase subunit b, chloroplastic                    | 289.679                                        | 307.298                                        | 0.03    | ATP synthesis                   |
| 3   | A0A077RST2  | <i>Triticum aestivum</i>       | Carbonic anhydrase                                       | 378.184                                        | 394.647                                        | 0.02    | carbon utilization              |
| 4   | A0A1D5UJL4  | <i>Triticum aestivum</i>       | Uncharacterized protein                                  | 162.178                                        | 236.165                                        | 0.02    | Catalytic activity              |
| 5   | A0A1D6D889  | <i>Triticum aestivum</i>       | Thioredoxin                                              | 219.047                                        | 233.312                                        | 0.04    | Defense response                |
| 6   | D8L9G3      | <i>Triticum aestivum</i>       | Sedoheptulose-1,7-bisphosphatase, chloroplast, expressed | 337.275                                        | 372.183                                        | 0.02    | Defense response                |
| 7   | M8B2C7      | <i>Triticum aestivum</i>       | Sedoheptulose-1,7-bisphosphatase, chloroplastic          | 72.196                                         | 86.066                                         | 0.01    | Defense response                |
| 8   | A0A1D6RID7  | <i>Triticum aestivum</i>       | Lymphoid enhancer-binding factor 1                       | 274.190                                        | 287.179                                        | 0.01    | Defense response                |
| 9   | M8BLC1      | <i>Aegilops tauschii</i>       | Uncharacterized protein                                  | 223.891                                        | 247.490                                        | 0.05    | DNA binding                     |
| 10  | T1L8T4      | <i>Triticum urartu</i>         | Histone H4                                               | 437.372                                        | 488.146                                        | 0.04    | DNA binding                     |
| 11  | A0A2A4TTB9  | <i>Elusimicrobia bacterium</i> | Uncharacterized protein                                  | 383.787                                        | 402.378                                        | 0.03    | DNA binding                     |

|    |            |                           |                                       |         |         |      |                                        |
|----|------------|---------------------------|---------------------------------------|---------|---------|------|----------------------------------------|
| 12 | M8C4F9     | <i>Aegilops tauschii</i>  | Plastocyanin                          | 253.183 | 277.392 | 0.02 | Electron transfer activity             |
| 13 | A0A1D5SZE5 | <i>Triticum aestivum</i>  | Uncharacterized protein               | 267.752 | 288.103 | 0.04 | Enzymatic activity                     |
| 14 | Q0WYG8     | <i>Triticum aestivum</i>  | Triticain alpha                       | 212.005 | 240.878 | 0.01 | Growth regulation                      |
| 15 | A0A2X0SW30 | <i>Triticum aestivum</i>  | Uncharacterized protein               | 177.832 | 201.371 | 0.03 | Growth regulation                      |
| 16 | A0A1D6C852 | <i>Triticum aestivum</i>  | Fructose-bisphosphate aldolase        | 194.749 | 237.163 | 0.01 | Host cell surface receptor binding     |
| 17 | Q6LBU2     | <i>Triticum aestivum</i>  | RbcL gene product (30 AA) (Fragment)  | 123.847 | 167.940 | 0.05 | Magnesium ion-binding                  |
| 18 | A0A2G2MTL5 | <i>Robigi nitomaculum</i> | Formate dehydrogenase                 | 244.926 | 278.199 | 0.04 | Metal-ion binding                      |
| 19 | A0A1D6RID6 | <i>Triticum aestivum</i>  | E3 ubiquitin-protein transferase MAEA | 303.192 | 384.254 | 0.04 | Negative regulation of gluconeogenesis |
| 20 | A0A341SEH0 | <i>Triticum aestivum</i>  | Uncharacterized protein               | 357.281 | 384.269 | 0.02 | Not assigned                           |
| 21 | A0A341QH30 | <i>Triticum aestivum</i>  | Uncharacterized protein               | 69.736  | 73.273  | 0.01 | Not assigned                           |
| 22 | A0A1D5S0I6 | <i>Triticum aestivum</i>  | Uncharacterized protein               | 156.934 | 275.294 | 0.04 | Not assigned                           |
| 23 | W4ZRQ6     | <i>Triticum aestivum</i>  | Uncharacterized protein               | 177.582 | 204.285 | 0.03 | Not assigned                           |
| 24 | A0A1D5YGN4 | <i>Triticum aestivum</i>  | Uncharacterized protein               | 243.186 | 274.678 | 0.02 | Not assigned                           |
| 25 | A0A1D5Z536 | <i>Triticum aestivum</i>  | Uncharacterized protein               | 378.199 | 384.385 | 0.04 | Not assigned                           |
| 26 | A0A341PKR8 | <i>Triticum aestivum</i>  | Uncharacterized protein               | 457.560 | 488.211 | 0.01 | Not assigned                           |
| 27 | W5ASV0     | <i>Triticum aestivum</i>  | Uncharacterized protein               | 164.893 | 176.037 | 0.01 | Not assigned                           |

|    |            |                                 |                                                   |         |         |      |                                           |
|----|------------|---------------------------------|---------------------------------------------------|---------|---------|------|-------------------------------------------|
| 28 | W5EGN1     | <i>Triticum aestivum</i>        | Uncharacterized protein                           | 267.870 | 289.479 | 0.01 | Not assigned                              |
| 29 | A0A1D5YP02 | <i>Triticum aestivum</i>        | Uncharacterized protein                           | 137.951 | 174.835 | 0.04 | Not assigned                              |
| 30 | A0A341U9K6 | <i>Triticum aestivum</i>        | Uncharacterized protein                           | 401.059 | 463.784 | 0.02 | Not assigned                              |
| 31 | M8AE10     | <i>Triticum urartu</i>          | Oxygen-evolving enhancer protein 1, chloroplastic | 255.985 | 371.381 | 0.03 | Photosynthesis                            |
| 32 | W5AQE7     | <i>Triticum aestivum</i>        | Uncharacterized protein                           | 278.472 | 305.386 | 0.01 | Photosynthesis                            |
| 33 | N1R4X3     | <i>Aegilops tauschii</i>        | Oxygen-evolving enhancer protein 1, chloroplastic | 337.410 | 373.193 | 0.03 | Photosynthesis                            |
| 34 | M7ZWU9     | <i>Triticum urartu</i>          | Chlorophyll a-b binding protein, chloroplastic    | 398.139 | 404.740 | 0.02 | Photosynthesis                            |
| 35 | Q2L3E3     | <i>Brachy podium sylvaticum</i> | Photosystem 1 subunit 5                           | 143.573 | 187.574 | 0.05 | Photosynthesis                            |
| 36 | G8J4D7     | <i>Pinus dalatensis</i>         | Photosystem II protein D1 (Fragment)              | 260.649 | 278.163 | 0.04 | Photosynthesis                            |
| 37 | A0A218M004 | <i>Triticum turgidum</i>        | Photosystem II protein D1                         | 281.291 | 284.472 | 0.03 | Photosynthesis                            |
| 38 | A0A218LW49 | <i>Triticum aestivum</i>        | Photosystem II protein D1 (Fragment)              | 307.183 | 338.748 | 0.03 | Photosynthesis                            |
| 39 | A0A0W7VKQ7 | <i>Trichode rmagamsii</i>       | Uncharacterized protein                           | 294.575 | 308.173 | 0.02 | Protein disulfide oxidoreductase activity |
| 40 | Q6XPZ6     | <i>Triticum aestivum</i>        | Peptidyl-prolyl cis-trans isomerase               | 183.193 | 188.890 | 0.01 | Protein folding                           |
| 41 | A0A1D5V1U8 | <i>Triticum aestivum</i>        | Cytochrome b6-f complex iron-sulf                 | 327.782 | 389.137 | 0.04 | Protein metabolism                        |

|    |            |                                     |                                                |         |         |      |                              |
|----|------------|-------------------------------------|------------------------------------------------|---------|---------|------|------------------------------|
|    |            |                                     | ur subunit                                     |         |         |      |                              |
| 42 | A0A1D5ZYK7 | <i>Triticum aestivum</i>            | Uncharacterized protein                        | 251.197 | 277.281 | 0.05 | Protein-protein interaction  |
| 43 | A0A2G2KMZ9 | <i>Halomonas sp.</i>                | Histidine kinase                               | 278.912 | 304.338 | 0.03 | Signaling                    |
| 45 | W5GHG3     | <i>Triticum aestivum</i>            | Caleosin                                       | 289.037 | 301.759 | 0.01 | Stress response              |
| 46 | M8BMC6     | <i>Aegilops tauschii</i>            | Putative L-ascorbate peroxidase, chloroplastic | 337.173 | 364.833 | 0.02 | Stress response              |
| 47 | G8J0W2     | <i>Pinus hwangshanensis</i>         | Photosystem II protein D1                      | 317.389 | 374.429 | 0.04 | Stress response              |
| 48 | C3SAB3     | <i>Brachypodium distachyon</i>      | Proline-rich protein                           | 388.648 | 403.462 | 0.03 | Stress response              |
| 49 | A0A2W1CYE9 | <i>Pyrenophora tritici-repentis</i> | Cell surface protein (Mas1) (Fragment)         | 153.902 | 167.419 | 0.02 | Structural molecule activity |
| 50 | A0A2H3GU83 | <i>Gibber ellazeae</i>              | Uncharacterized protein                        | 189.193 | 224.831 | 0.03 | Transcription                |
| 51 | T1MLC6     | <i>Triticum aestivum</i>            | Uncharacterized protein                        | 265.479 | 278.194 | 0.04 | Translation                  |
| 52 | M8A946     | <i>Triticum urartu</i>              | 50S ribosomal protein L12-1, chloroplastic     | 201.104 | 247.193 | 0.02 | Translation                  |
| 53 | M8C9E4     | <i>Aegilops tauschii</i>            | Fructose-bisphosphate aldolase                 | 381.848 | 422.474 | 0.01 | Glycolytic process           |

**Table S3.** Relative abundance and functional categorization of up-regulated proteins in response to 40 mg.L<sup>-1</sup> of TiO<sub>2</sub> NPs under *Puccinia striiformis* stress.

| No | Protein IDs | Species                   | Description                                            | Normalized Average (T3L) mg.L <sup>-1</sup> | Normalized Average (T0L) mg.L <sup>-1</sup> | P Value | Functions                              |
|----|-------------|---------------------------|--------------------------------------------------------|---------------------------------------------|---------------------------------------------|---------|----------------------------------------|
| 1  | A0A1D5UEG2  | <i>Triticum aestivum</i>  | Acetyl-CoA acetyltransferase                           | 378.671                                     | 319.894                                     | 0.04    | Acetyl-co A-acetyltransferase activity |
| 2  | A0A1D6A8N9  | <i>Triticum aestivum</i>  | ABC transport system ATP binding protein               | 568.893                                     | 489.293                                     | 0.03    | ATP binding                            |
| 3  | A0A2P4ZTZ1  | <i>Trichoderma gamsii</i> | Mannose-1-phosphate guanylyltransferase                | 492.107                                     | 356.282                                     | 0.03    | Biosynthetic process                   |
| 4  | A0A2G2L7J4  | <i>Kangiella sp.</i>      | Phosphoribulokinase                                    | 378.781                                     | 311.782                                     | 0.02    | Carbohydrate metabolism                |
| 5  | A0A341V0H6  | <i>Triticum aestivum</i>  | Uncharacterized protein                                | 468.675                                     | 289.174                                     | 0.05    | Carbohydrate metabolism                |
| 6  | M8CYL1      | <i>Aegilops tauschii</i>  | Uncharacterized protein                                | 367.278                                     | 117.812                                     | 0.03    | Coenzyme binding                       |
| 7  | A0A1D6ARF6  | <i>Triticum aestivum</i>  | UDP-N-acetylmuramoylalanine--D-glutamate ligase        | 210.784                                     | 201.891                                     | 0.04    | Degradation                            |
| 8  | R7W7A6      | <i>Aegilops tauschii</i>  | Histone H4                                             | 102.183                                     | 66.967                                      | 0.05    | DNA Binding                            |
| 9  | A0A1D5U2B3  | <i>Triticum aestivum</i>  | Protein-L-isoaspartate O-methyltransferase             | 197.107                                     | 118.281                                     | 0.02    | DNA repair                             |
| 10 | M8CY84      | <i>Aegilops tauschii</i>  | Ferredoxin-dependent glutamate synthase, chloroplastic | 378.192                                     | 301.718                                     | 0.03    | Glutamate biosynthetic process         |
| 11 | A0A1D5UEF9  | <i>Triticum aestivum</i>  | Pyruvate formate-lyase-activating enzyme               | 532.178                                     | 309.285                                     | 0.01    | Metal ion binding                      |
| 12 | A0A1D6B301  | <i>Triticum aestivum</i>  | Oxidoreductase molybdopterin binding                   | 99.373                                      | 85.175                                      | 0.04    | Nitrate assimilation                   |
| 13 | A0A1D5ZS58  | <i>Trticum aestivum</i>   | Uncharacterized protein                                | 146.184                                     | 118.572                                     | 0.03    | Not assigned                           |
| 14 | A0A1D5SGL1  | <i>Trticum aestivum</i>   | Uncharacterized protein                                | 371.379                                     | 319.073                                     | 0.02    | Not assigned                           |

|    |            |                            |                                                          |         |         |      |                             |
|----|------------|----------------------------|----------------------------------------------------------|---------|---------|------|-----------------------------|
| 15 | A0A1D5TP57 | <i>Triticum aestivum</i>   | Uncharacterized protein                                  | 467.927 | 300.963 | 0.01 | Not assigned                |
| 16 | O65795     | <i>Trticum aestivum</i>    | Histone H1                                               | 560.145 | 482.082 | 0.04 | Nucleosome assembly         |
| 17 | Q8L686     | <i>Triticum aestivum</i>   | Germin-like protein                                      | 290.216 | 210.728 | 0.03 | Nutrient reservoir activity |
| 18 | M8D2E7     | <i>Aegilops tauschii</i>   | Germin-like protein 8-14                                 | 365.178 | 318.175 | 0.02 | Nutrient reservoir activity |
| 19 | Q9M4V4     | <i>Triticum aestivum</i>   | Cytosolic glyceraldehyde-3-phosphate dehydrogenase GAPDH | 147.738 | 119.967 | 0.02 | Oxidoreductase activity     |
| 20 | A0A1D6DBA5 | <i>Triticum aestivum</i>   | Membrane protease subunits, stomatin/prohibitin homologs | 289.082 | 217.185 | 0.01 | Peptidase activity          |
| 21 | M7ZDA2     | <i>Trticum urartu</i>      | Flavoprotein wrbA                                        | 467.289 | 290.267 | 0.04 | Photosynthesis              |
| 22 | A0A218LW49 | <i>Triticum aestivum</i>   | Photosystem II protein D1 (Fragment)                     | 529.995 | 412.784 | 0.03 | Photosynthesis              |
| 23 | M7ZCG5     | <i>Triticum urartu</i>     | Chlorophyll a-b binding protein, chloroplastic           | 504.182 | 389.035 | 0.03 | Photosynthesis              |
| 24 | A0A218LZA3 | <i>Triticum turgidum</i>   | Photosystem I P700 apoprotein A1                         | 489.389 | 475.386 | 0.04 | Photosynthesis              |
| 25 | A0A075VYZ0 | <i>Aegilops speltoides</i> | Photosystem I P700 chlorophyll a apoprotein A1           | 381.782 | 295.673 | 0.01 | Photosynthesis              |
| 26 | A0A075VVT5 | <i>Aegilops speltoides</i> | Photosystem II D2 protein                                | 290.671 | 218.083 | 0.05 | Photosynthesis              |
| 27 | M8C4F9     | <i>Aegilops tauschii</i>   | Plastocyanin                                             | 167.903 | 164.097 | 0.03 | Photosynthesis              |
| 28 | S4YZY7     | <i>Triticum monococcum</i> | Photosystem I iron-sulfur center                         | 390.174 | 371.659 | 0.02 | Photosynthesis              |
| 29 | A0A220IKU8 | <i>Triticum turgidum</i>   | Cytochrome b6 (Fragment)                                 | 291.782 | 219.740 | 0.03 | Photosynthesis              |
| 30 | A0A1D5SGL3 | <i>Trticum aestivum</i>    | Uncharacterized protein                                  | 119.637 | 78.192  | 0.01 | Plant defense               |
| 31 | G8IZV2     | <i>Pinus pringlei</i>      | Photosystem II protein D1 (Fragment)                     | 58.963  | 22.891  | 0.04 | Plant defense               |
| 32 | M7Z200     | <i>Triticum urartu</i>     | ATP synthase delta chain, chloroplastic                  | 489.672 | 431.489 | 0.02 | Plant defense               |
| 33 | Q7XYE2     | <i>Triticum aestivum</i>   | Catalase isozyme (Fragment)                              | 374.863 | 318.674 | 0.04 | Plant defense               |
| 34 | M8C1W9     | <i>Aegilops taushii</i>    | L-ascorbate peroxidase 2, cytosolic                      | 278.182 | 201.648 | 0.03 | Plant defense               |
| 35 | Q43219     | <i>Triticum aestivum</i>   | Peroxidase (Fragment)                                    | 290.673 | 217.783 | 0.04 | Plant defense               |

|    |            |                                      |                                                            |         |         |      |                               |
|----|------------|--------------------------------------|------------------------------------------------------------|---------|---------|------|-------------------------------|
| 36 | A0A2A5D5U0 | <i>Gammaproteobacteria bacterium</i> | Protein translocase subunit SecA                           | 378.782 | 319.672 | 0.02 | Protein targeting             |
| 37 | A0A0D9B503 | <i>Pseudomonas fluorescens</i>       | Pyruvate carboxylase subunit B                             | 163.361 | 161.387 | 0.03 | Pyruvate carboxylase activity |
| 38 | M8CIQ4     | <i>Aegilops tauschii</i>             | Thioredoxin M-type, chloroplastic                          | 178.572 | 166.834 | 0.01 | redox                         |
| 39 | A0A1D6S409 | <i>Triticum aestivum</i>             | tRNA-dihydrouridine synthase                               | 378.381 | 301.078 | 0.01 | redox                         |
| 40 | M8B795     | <i>Aegilops tauschii</i>             | Ferredoxin--NADP reductase, chloroplastic                  | 371.532 | 267.930 | 0.04 | redox                         |
| 41 | M8CIQ4     | <i>Aegilops tauschii</i>             | Thioredoxin M-type, chloroplastic                          | 457.196 | 401.749 | 0.03 | redox                         |
| 42 | M8AQG0     | <i>Triticum urartu</i>               | Ribonuclease 1                                             | 518.924 | 499.056 | 0.02 | RNA binding                   |
| 43 | M7ZVH4     | <i>Triticum urartu</i>               | 31 kDa ribonucleoprotein, chloroplastic                    | 469.386 | 318.174 | 0.04 | RNA binding                   |
| 44 | O23798     | <i>Triticum aestivum</i>             | Ps16 protein                                               | 738.289 | 589.059 | 0.04 | RNA binding                   |
| 45 | A0A1D6AKZ2 | <i>Triticum aestivum</i>             | Peptidase                                                  | 494.896 | 412.068 | 0.05 | Secondary metabolism          |
| 46 | A0A1D5RRM4 | <i>Triticum aestivum</i>             | Phosphatidate cytidyltransferase                           | 389.117 | 385.682 | 0.03 | Secondary metabolism          |
| 47 | A6XMY5     | <i>Trticum monococcum</i>            | Serine hydroxymethyltransferase                            | 183.863 | 182.087 | 0.02 | Secondary metabolism          |
| 48 | M7ZKR5     | <i>Triticum urartu</i>               | Receptor-like serine/threonine-protein kinase SD1-8        | 458.585 | 422.178 | 0.01 | Signaling                     |
| 49 | A0A1B5GE54 | <i>Triticum aestivum</i>             | Caleosin                                                   | 673.904 | 579.067 | 0.04 | Stress response               |
| 50 | N1QPF5     | <i>Aegilops taushii</i>              | Putative plastid-lipid-associated protein 3, chloroplastic | 345.851 | 338.069 | 0.03 | Stress response               |
| 51 | A0A1D6BF30 | <i>Triticum aestivum</i>             | Acetyltransferase                                          | 438.696 | 437.008 | 0.05 | Transferase activity          |
| 52 | A0A1D6CM42 | <i>Triticum aestivum</i>             | 30S ribosomal protein S13                                  | 237.680 | 217.704 | 0.03 | Translation                   |
| 53 | M8BN49     | <i>Aegilops tauschii</i>             | 50S ribosomal protein L12-2, chloroplastic                 | 468.058 | 457.670 | 0.04 | Translation                   |
| 54 | A0A1D6CI24 | <i>Triticum aestivum</i>             | Elongation factor EF-Tu                                    | 389.057 | 376.059 | 0.01 | Translation                   |
| 55 | M8BN49     | <i>Aegilops tauschii</i>             | 50S ribosomal protein L12-2,                               | 177.705 | 152.057 | 0.01 | Translation                   |

|    |            |                               |                                              |         |         |      |             |
|----|------------|-------------------------------|----------------------------------------------|---------|---------|------|-------------|
|    |            |                               | chloroplastic                                |         |         |      |             |
| 56 | A0A1D6B0E1 | <i>Triticum aestivum</i>      | Transmembrane transporter                    | 275.058 | 271.975 | 0.04 | Transport   |
| 57 | F9WY06     | <i>Zymos eptoriatritici</i> # | Uncharacterized protein                      | 286.056 | 172.067 | 0.03 | Transport   |
| 58 | A0A1D5WKK3 | <i>Triticum aestivum</i>      | Binding-protein-dependent transport systems  | 366.764 | 164.784 | 0.05 | Transport   |
| 59 | A0A1D6ABX5 | <i>Triticum aestivum</i>      | Two component transcriptional regulator      | 378.851 | 365.653 | 0.02 | Transport   |
| 60 | A0A2G2MY2  | <i>Pseudomonas sp.</i>        | Oxaloacetate decarboxylase subunit alpha     | 304.892 | 186.468 | 0.01 | Transport   |
| 61 | A0A218M001 | <i>Triticum turgidum</i>      | ATP synthase subunit b, chloroplastic        | 396.694 | 390.597 | 0.04 | Transport   |
| 62 | N1R5T6     | <i>Aegilops tauschii</i>      | ATP synthase delta chain, chloroplastic      | 275.058 | 258.572 | 0.03 | Transport   |
| 63 | G8J3N2     | <i>Pinus discolor</i>         | Ribulose biphosphate carboxylase large chain | 386.564 | 376.759 | 0.04 | Respiration |

**Table S4.** Relative abundance and functional categorization of down-regulated proteins of wheat plants applied by 40 mg.L<sup>-1</sup> of TiO<sub>2</sub> NPs with *Puccinia striiformis* infection.

| No | Protein IDs | Species                     | Description                                                        | Normalized Average (T3L) mg.L <sup>-1</sup> | Normalized average (T0L) mg.L <sup>-1</sup> | P value | Functions                            |
|----|-------------|-----------------------------|--------------------------------------------------------------------|---------------------------------------------|---------------------------------------------|---------|--------------------------------------|
| 1  | M8ASF0      | <i>Triticum urartu</i>      | Thioredoxin                                                        | 244.786                                     | 348.601                                     | 0.04    | redox                                |
| 2  | A0A1D5U3N1  | <i>Triticum aestivum</i>    | 2-dehydro-3-deoxyphosphogluconate aldolase                         | 135.949                                     | 156.058                                     | 0.02    | Aldolase activity                    |
| 3  | M8AYQ8      | <i>Aegilops tauschii</i>    | Basic 7S globulin                                                  | 84.807                                      | 165.469                                     | 0.03    | Aspartic-type endopeptidase activity |
| 4  | A0A1D6BFT5  | <i>Triticum aestivum</i>    | Nickel transport ATP-binding protein NikD                          | 136.140                                     | 155.770                                     | 0.03    | ATP binding                          |
| 5  | B6VCN3      | <i>Triticum monococcum</i>  | Putative vacuolar ATP synthase subunit B isoform 1                 | 234.788                                     | 267.904                                     | 0.01    | ATP binding                          |
| 6  | M7ZV39      | <i>Triticum urartu</i>      | Putative plastid-lipid-associated protein 13, chloroplastic        | 277.561                                     | 341.572                                     | 0.01    | ATP binding                          |
| 7  | A0A144KR50  | <i>Triticum aestivum</i>    | Ribulose biphosphate carboxylase activase B                        | 298.567                                     | 343.785                                     | 0.04    | ATP binding                          |
| 8  | Q9SAU8      | <i>Triticum aestivum</i>    | HSP70                                                              | 369.042                                     | 377.451                                     | 0.03    | ATP binding                          |
| 9  | G3LUU7      | <i>Triticum aestivum</i>    | CytHSP70 (Fragment                                                 | 384.673                                     | 389.562                                     | 0.01    | ATP binding                          |
| 10 | E7D433      | <i>Triticum aestivum</i>    | EF-hand calcium-binding protein                                    | 266.348                                     | 300.869                                     | 0.02    | Calcium binding                      |
| 11 | W5E5Z3      | <i>Triticum aestivum</i>    | Ribulose-phosphate 3-epimerase                                     | 153.781                                     | 177.563                                     | 0.03    | Carbohydrate metabolism              |
| 12 | M8CC18      | <i>Aegilops tauschii</i>    | Phosphoribulokinase                                                | 345.009                                     | 386.792                                     | 0.03    | Carbohydrate metabolism              |
| 13 | A0A1D5UJL4  | <i>Triticum aestivum</i>    | Anaerobic ribonucleoside-triphosphate reductase activating protein | 341.673                                     | 367.900                                     | 0.05    | Catalytic activity                   |
| 14 | F9XA11      | <i>Zymos eptoriatritici</i> | Vacuolar proton pump subunit B                                     | 389.341                                     | 454.719                                     | 0.02    | Defense response                     |

|    |            |                                             |                                                |         |         |      |                                 |
|----|------------|---------------------------------------------|------------------------------------------------|---------|---------|------|---------------------------------|
| 15 | M8CYL1     | <i>Aegilops tauschii</i>                    | Uncharacterized protein                        | 267.794 | 284.528 | 0.02 | Coenzyme binding                |
| 16 | Q0WXG8     | <i>Triticum aestivum</i>                    | Triticain alpha                                | 278.073 | 297.893 | 0.03 | Cystein type peptidase activity |
| 17 | M8C5I7     | <i>Aegilops tauschii</i>                    | Oryzain alpha chain                            | 245.788 | 277.004 | 0.03 | Cystein type peptidase activity |
| 18 | A0A1D5VN83 | <i>Triticum aestivum</i>                    | Response regulator receiver protein            | 267.891 | 286.702 | 0.01 | DNA Binding                     |
| 19 | A0A1D6S409 | <i>Triticum aestivum</i>                    | tRNA-dihydrouridine synthase                   | 175.782 | 187.987 | 0.04 | FAD binding                     |
| 20 | A0A1D5SGL2 | <i>Triticum aestivum</i>                    | Uncharacterized protein                        | 144.890 | 158.582 | 0.03 | FMN binding                     |
| 21 | Q8LLS8     | <i>Aegilops speltoides</i>                  | Phosphoglycerate kinase (Fragment)             | 256.773 | 288.893 | 0.02 | Glycolytic process              |
| 22 | A0A2G1ZD24 | <i>Shewanella sp.</i>                       | Fructose-1,6-bisphosphate aldolase             | 277.579 | 288.048 | 0.04 | Glycolytic process              |
| 23 | A0A2G1ZD24 | <i>Shewanella sp.</i>                       | Fructose-1,6-bisphosphate aldolase             | 166.842 | 178.531 | 0.02 | Glycolytic process              |
| 24 | A0A1D5VHF9 | <i>Trticum aestivum</i>                     | Alpha/beta hydrolase fold protein              | 189.704 | 207.983 | 0.03 | Hydrolase activity              |
| 25 | A0A1D5ZS59 | <i>Triticum aestivum</i>                    | Peptidase                                      | 347.807 | 388.561 | 0.05 | Hydrolase activity              |
| 26 | A0A1D6BGA3 | <i>Triticum aestivum</i>                    | TIGR01457 family HAD hydrolase                 | 457.958 | 466.068 | 0.04 | Hydrolase activity              |
| 27 | A0A341XUD8 | <i>Triticum aestivum</i>                    | Uncharacterized protein                        | 220.960 | 265.782 | 0.03 | Not assigned                    |
| 28 | A0A1D5ZB56 | <i>Triticum aestivum</i>                    | Uncharacterized protein                        | 345.886 | 367.009 | 0.02 | Not assigned                    |
| 29 | A0A2A5DPV1 | <i>Candidatus Hydrogenedentes bacterium</i> | Uncharacterized protein                        | 371.864 | 389.341 | 0.04 | Not assigned                    |
| 30 | Q9XHL9     | <i>Triticum aestivum</i>                    | Histone H1 WH1B.1                              | 388.558 | 390.676 | 0.01 | Nucleosome assembly             |
| 31 | N1QZX5     | <i>Aegilops tauschii</i>                    | Chlorophyll a-b binding protein, chloroplastic | 112.671 | 156.565 | 0.04 | Photosynthesis                  |

|    |              |                                |                                                   |         |         |      |                                   |
|----|--------------|--------------------------------|---------------------------------------------------|---------|---------|------|-----------------------------------|
| 32 | FER          | <i>Triticum aestivum</i>       | Ferredoxin, chloroplastic                         | 187.905 | 188.672 | 0.02 | Photosynthesis                    |
| 33 | M8BMC6       | <i>Aegilops tauschii</i>       | Putative L-ascorbate peroxidase, chloroplastic    | 276.006 | 288.675 | 0.03 | Plant defense                     |
| 34 | N1R449       | <i>Aegilops tauschii</i>       | Glycerate dehydrogenase                           | 453.859 | 488.784 | 0.03 | redox                             |
| 35 | G8J3N2       | <i>Pinus discolor</i>          | Ribulose biphosphate carboxylase large chain      | 486.903 | 506.893 | 0.01 | Respiration                       |
| 36 | RBL          | <i>Triticum aestivum</i>       | Ribulose biphosphate carboxylase large chain      | 245.975 | 277.672 | 0.01 | Respiration                       |
| 37 | A0A1D5ZS57   | <i>Triticum aestivum</i>       | Bifunctional enzyme deaminase/reductase           | 357.884 | 377.358 | 0.01 | Riboflavin biosynthetic process   |
| 38 | A0A1D6S4T3   | <i>Triticum aestivum</i>       | Polyprenyl synthetase                             | 38.953  | 39.010  | 0.04 | Secondary metabolism              |
| 39 | W5HK74       | <i>Triticum aestivum</i>       | Vacuolar proton pump subunit B                    | 55.793  | 66.852  | 0.02 | Secondary metabolism              |
| 40 | A0A1D5WB89   | <i>Triticum aestivum</i>       | 4-diphosphocytidyl-2-C-methyl-D-erythritol kinase | 163.892 | 188.674 | 0.01 | Secondary metabolism              |
| 41 | A0A1D6BFP3   | <i>Triticum aestivum</i>       | Bifunctional protein FolD                         | 267.923 | 288.581 | 0.04 | Secondary metabolism              |
| 42 | H9NAV2       | <i>Triticum aestivum</i>       | Chloroplast Cu/Zn superoxide dismutase            | 185.842 | 289.056 | 0.03 | Stress response                   |
| 43 | A0A0D9AXN4   | <i>Pseudomonas fluorescens</i> | Transposase                                       | 177.570 | 188.049 | 0.03 | Stress response                   |
| 44 | C3VQ52       | <i>Triticum aestivum</i>       | Ascorbate peroxidase (Fragment)                   | 165.002 | 267.902 | 0.02 | Stress response                   |
| 45 | M8A8P8       | <i>Triticum urartu</i>         | Heat shock cognate 70 kDa protein 4               | 462.569 | 476.354 | 0.01 | Stress response                   |
| 46 | Q5QJA6       | <i>Triticum aestivum</i>       | Harpin binding protein                            | 343.856 | 377.967 | 0.04 | Stress response                   |
| 47 | Q8LRM8 TCTP_ | <i>Triticum aestivum</i>       | Translationally-controlled tumor protein homolog  | 255.784 | 277.990 | 0.04 | Stress response                   |
| 48 | M7YF70       | <i>Triticum urartu</i>         | Uncharacterized protein                           | 281.679 | 364.792 | 0.01 | Stress response                   |
| 49 | A0A1D6A140   | <i>Triticum aestivum</i>       | CalU4                                             | 160.083 | 166.331 | 0.03 | Sulfuric ester hydrolase activity |

|    |            |                                     |                                                        |         |         |      |             |
|----|------------|-------------------------------------|--------------------------------------------------------|---------|---------|------|-------------|
| 50 | TCTP       | <i>Triticum aestivum</i>            | Translationally-controlled tumor protein homolog       | 177.486 | 186.663 | 0.04 | Translation |
| 51 | A0A077S298 | <i>Triticum aestivum</i>            | Uncharacterized protein                                | 246.057 | 277.004 | 0.02 | Translation |
| 52 | A0A1D6S9T8 | <i>Triticum aestivum</i>            | Transporter, auxin efflux carrier (AEC) family protein | 266.873 | 341.691 | 0.05 | Transport   |
| 53 | M7YQE1     | <i>Triticum urartu</i>              | ADP, ATP carrier protein, mitochondrial                | 331.672 | 388.569 | 0.04 | Transport   |
| 54 | K3W1Z6     | <i>Fusarium pseudograminearum</i>   | Uncharacterized protein                                | 364.601 | 399.005 | 0.03 | Transport   |
| 55 | B2W2V5     | <i>Pyrenophora tritici-repentis</i> | ADP, ATP carrier protein                               | 260.068 | 289.633 | 0.05 | Transport   |
| 56 | N1R5T6     | <i>Aegilops tauschii</i>            | ATP synthase delta chain, chloroplastic                | 178.572 | 215.950 | 0.02 | Transport   |
| 57 | A0A1D6CVC4 | <i>Triticum aestivum</i>            | NADH-quinone oxidoreductase subunit N                  | 188.093 | 197.572 | 0.02 | Transport   |
| 58 | A0A1D6S9T8 | <i>Triticum aestivum</i>            | Transporter, auxin efflux carrier (AEC) family protein | 305.682 | 331.794 | 0.01 | Transport   |
